# Supplementary material for: Further insights into the thermodynamics of linear carbon chains for temperatures ranging from 13 to 300 K
Source: publisher site journal article supplement (doi:10.3762/bjnano.16.125), 2025-10-20
Supplement: Additional file 1 [file 2190-4286-16-125-S1.pdf]

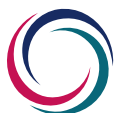

## Supporting Information

for

### **Further insights into the thermodynamics of linear carbon chains for temperatures ranging from 13 to 300 K**

Alexandre Rocha Paschoal, Thiago Alves de Moura, Juan S. Rodríguez-Hernández, Carlos William de Araujo Paschoal, Yoong Ahm Kim, Morinobu Endo and Paulo T. Araujo

*Beilstein J. Nanotechnol.* **2025**, *16*, 1818–1825. doi:10.3762/bjnano.16.125

### **Additional figures and calculations**

## Representative Raman spectra:

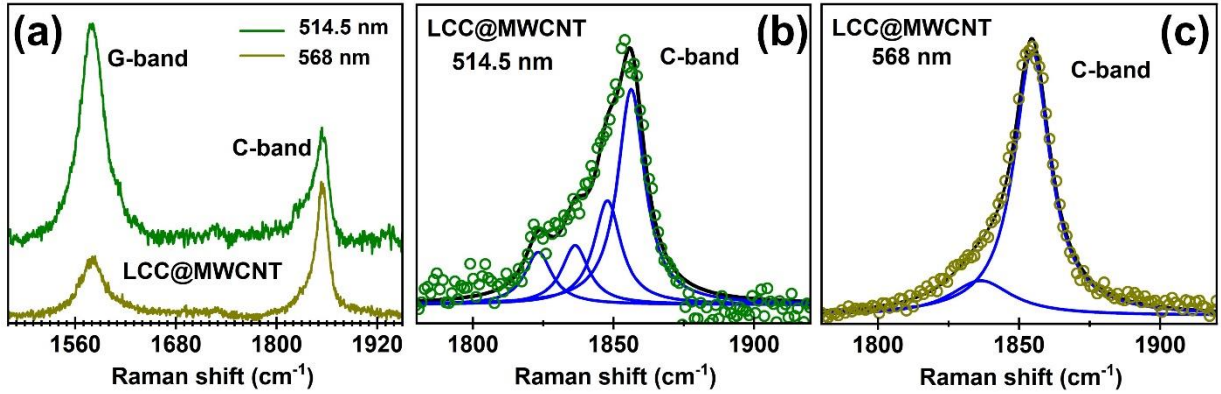

**Figure S1:** (a), (b) and (c) Representative Raman spectra obtained at 293 K using 514.5 nm and 568 nm lasers. In (a), the G-band from the host CNT is around 1580 cm<sup>-1</sup> and the C-band is around 1850 cm<sup>-1</sup>. (b) using 514.5 nm and (c) using 568 nm, show the C-band, where the open symbols are the experimental data, the black solid curve is the fitting result using Lorentzian curves (navy blue solid curves). LCC@MWCNT stands for LCC encapsulated by MWCNT.

## Plots of the thermodynamic observable for the full set of LCC:

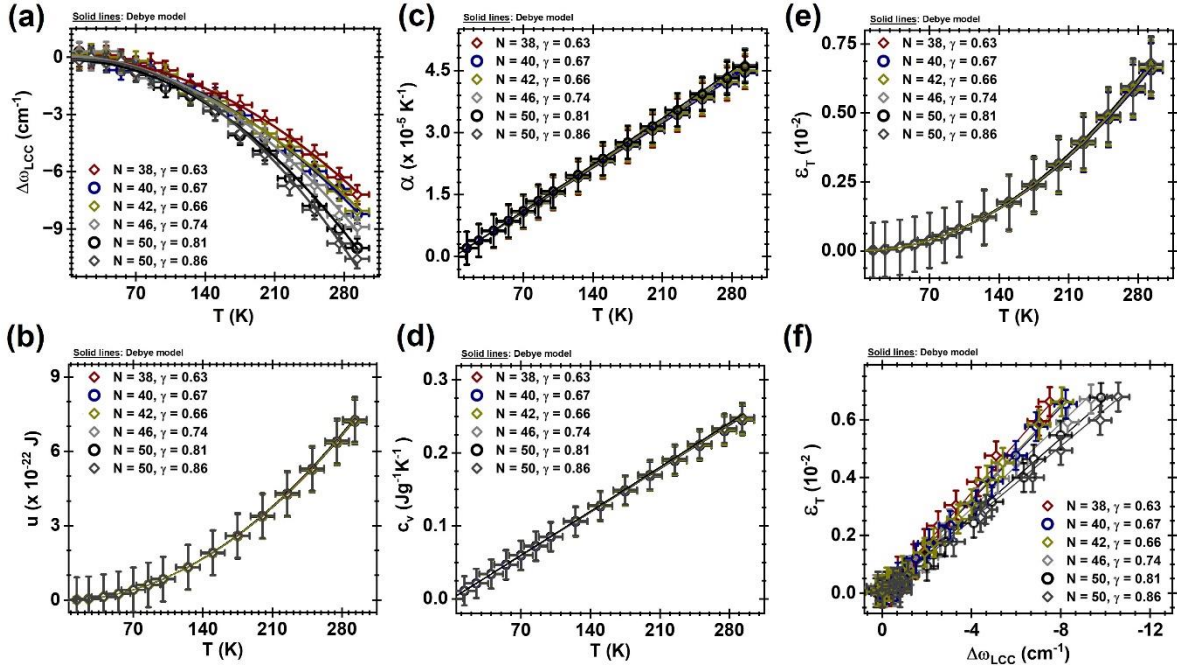

**Figure S2:** (a) experimental  $\Delta\omega_{LCC}(T)$  evolution with  $T$ ; (b) the energy per  $N$ ,  $u(T)$ , presents a quadratic, universal, and unified behavior with  $T$ ; (c)  $\alpha(T)$  shows a linear universal behavior with  $T$ ; (d) the heat capacity per  $N$ ,  $c_v(T)$ , presents a linear, universal and unified behavior with  $T$ ; (e) A  $T^2$  universal dependence is observed for the thermal strain  $\varepsilon_T(T)$ ; (f) Every LCC presents a distinct linear dependence of  $\varepsilon_T$  with  $\Delta\omega_{LCC}(T)$ .

## The Debye model for LCC:

Under the Debye model formalism (from now on DMF), the canonical partition function for LCC is given by **[1]**:

$$\ln Z = -N \frac{T}{T_{LCC}} \int_0^{\frac{T_{LCC}}{T}} \ln[1 - \exp(-x)] dx, \quad (\text{S1})$$

where  $x = \frac{\hbar \omega_{ph}}{k_b T} = \frac{T_{ph}}{T}$ ,  $\omega_{ph}$  is the phonon frequency and  $T_{ph}$  is the phonon equivalent temperature. Upon integration by parts, **Equation S1** becomes:

$$\ln Z \approx N \frac{T}{T_{LCC}} \int_0^{\frac{T_{LCC}}{T}} \frac{x}{e^x - 1} dx. \quad (\text{S2})$$

For  $T \ll T_{LCC}$ ,  $\frac{T_{LCC}}{T} \rightarrow \infty$  and **Equation S2** is simplified to:

$$\ln Z \approx N \frac{T}{T_{LCC}} \int_0^\infty \frac{x}{e^x - 1} dx = N \frac{T}{T_{LCC}} \left( \frac{\pi^2}{6} \right) = \frac{N k_b \pi^2}{6 \hbar} \frac{T}{\omega_{LCC}(T)}, \quad (\text{S3})$$

where  $\int_0^\infty \frac{x}{e^x - 1} dx = \frac{\pi^2}{6}$ . As thoroughly described by Costa and collaborators **[1]**, the LCC's internal energy per  $N$ ,  $u(T)$ ,  $c_v(T)$  and  $\alpha(T)$  must contain one term representing the Debye approximation plus corrections involving derivatives of  $\omega_{LCC}(T)$ . This way  $u(T)$  is:

$$u(T) = \frac{k_b T^2}{N} \frac{d(\ln Z)}{dT} = \frac{k_b^2 \pi^2}{6 \hbar} \frac{T^2}{\omega_{LCC}(T)} \left[ 1 - \frac{T}{\omega_{LCC}(T)} \frac{d\omega_{LCC}}{dT} \right], \quad (\text{S4})$$

**Equation S4** leads to the heat capacity per  $N$  -  $c_v(T)$ :

$$c_v(T) = \frac{du}{dT} = \frac{(k_b \pi)^2}{3 \hbar} \frac{T}{\omega_{LCC}(T)} \left\{ 1 - 2 \frac{T}{\omega_{LCC}(T)} \frac{d\omega_{LCC}}{dT} + \frac{T^2}{\omega_{LCC}^2(T)} \left[ \left( \frac{d\omega_{LCC}}{dT} \right)^2 - \frac{\omega_{LCC}}{2} \frac{d^2 \omega_{LCC}}{dT^2} \right] \right\}, \quad (\text{S5})$$

being  $\alpha(T)$  given by:

$$\alpha(T) = \frac{-\delta}{2 \theta^2} \frac{c_v(T)}{a_{C-C}} = \frac{42 (k_b \pi)^2}{3 \hbar m a_{C-C}^2} \frac{T}{\omega_{LCC}^3(T)} \left\{ 1 - 2 \frac{T}{\omega_{LCC}(T)} \frac{d\omega_{LCC}}{dT} + \frac{T^2}{\omega_{LCC}^2(T)} \left[ \left( \frac{d\omega_{LCC}}{dT} \right)^2 - \frac{\omega_{LCC}}{2} \frac{d^2 \omega_{LCC}}{dT^2} \right] \right\}, \quad (\text{S6})$$

where  $a_{C-C} = 1.37 \text{ \AA}$  is the average C-C distance,  $\theta = \frac{m[\omega_{LCC}(T)]^2}{2}$ ,  $\delta = \frac{-21 m[\omega_{LCC}(T)]^2}{a_{C-C}}$  and  $\varepsilon = \frac{m a_{C-C}^2 (\omega_{LCC}^0)^2}{72}$ .

## References:

**[1]** N. L. Costa et al., Thermodynamics of Linear Carbon Chains, Phys. Rev. Lett. 126, 125901 (2021).
